# Supplementary material
Source: publisher figshare collection journal article supplement (https://karger.figshare.com/ndownloader/files/17798468)
Supplement: Supplementary file 1 [file 17798468]

Table 1S: Level of confidence in pathological diagnoses and specific pathologic features in the cryobiopsies and explants

Notes: † denotes discrepancies between the two pathologists; * denotes a mismatch with the final explant diagnosis. The level of confidence in diagnosis was assessed using a Likert scale (L- low, M- moderate, H- high).

Abbreviations: DAD diffuse alveolar damage; FF fibroblastic foci; HCC honeycomb changes; HP hypersensitivity pneumonitis; NSIP nonspecific interstitial pneumonia; UIP usual interstitial pneumonia; "y" yes, "y?" probably yes, "n" no, "?" not sure.
